# Supplementary material
Source: PubMed Central journal article supplement (PMC7229651)
Supplement: pnas.1906840117.sapp.pdf [file pnas.1906840117.sapp.pdf]

# PNAS

[www.pnas.org](http://www.pnas.org)

1

2

Loss of *Arc* attenuates the behavioral and molecular responses for sleep homeostasis in mice

3

4

Ayako Suzuki, Masashi Yanagisawa, Robert W. Greene

5

6

Correspondence should be addressed to Masashi Yanagisawa, M.D., Ph.D. or Robert W. Greene, M.D., Ph.D.

7

8

Email: [yanagisawa.masa.fu@u.tsukuba.ac.jp](mailto:yanagisawa.masa.fu@u.tsukuba.ac.jp) or [robertw.greene@utsouthwestern.edu](mailto:robertw.greene@utsouthwestern.edu)

9

10 **This PDF file includes:**

11

12

Supplementary text

13

Figures S1 to S6

14

Table S1

15

SI References

16 **Supplementary Information Text**

17

18 **Materials and Methods**

19 **Animals.** Eight-week-old male C57BL/6 mice (Wakeland Laboratory, UTSW) and C57BL/6-background GFP  
20 knock-in Arc KO mice (Ref. 1, breeding pairs kindly provided by Dr. Kimberly Huber, UTSW) were housed  
21 under a 12 h/12 h light/dark cycle. Once mice were housed individually, they were gently handled once a  
22 day until the experimental day.

23

24 **Behavioral Studies.** Electroencephalography (EEG) and electromyography (EMG) electrode implantation  
25 was performed as follows: anteroposterior (AP): 1.7 mm, mediolateral (ML): 1.8 mm, dorsoventral (DV): –  
26 1.3 mm; and AP: –1.7 mm, ML: 1.8 mm, DV: –1.3 mm. All mice were allowed 14 days of recovery from  
27 surgery. Subsequently, mice were tethered, transferred onto a treadmill, and allowed 3 weeks of  
28 habituation on the recording system, after which EEG/EMG signals were monitored continuously for a 48-  
29 h period. Sleep deprivation (SD) and selective REM deprivation experiments were carried out from ZT0–4  
30 following a 24-h baseline EEG/EMG recording. The EEG/EMG signal was monitored during sleep deprivation  
31 (ZT0–4) and recovery sleep (ZT4–24). 4-h total SD was conducted using a treadmill at a speed of 1.0 m/min.  
32 REM SD was achieved by gentle handling under real-time EEG/EMG monitoring after REM sleep (theta  
33 wave) for 5 s continuously. Selective REM deprivation was performed gently, to allow mice to resume NREM  
34 sleep within 5 s after REM sleep disturbance via gentle handling. The REM sleep signal was detected as a  
35 combination of EEG wave amplitude reduction and EMG atonia. NREM delta energy was calculated as the  
36 averaged delta power ( $\mu\text{V}^2$ ) multiplied by NREM sleep duration (min) over 2 h.  $\Delta$  NREM delta energy was  
37 subtracted values of 4-h SD NREM delta energy from that of baseline at each matching time points. The  
38 scoring and analysis were performed using MatLab (MathWorks), as described previously (2).

39

40 **Nonbehavioral studies.** Mouse brains without EEG/EMG implantation were used in all nonbehavioral  
41 studies. Mice were randomly assigned into four treatment groups; *ad libitum* sleep (control) at ZT4, and  
42 ZT6, 4 h SD (SD), and 2 h recovery sleep after 4 h SD (recovery). All brain samples were collected at ZT4  
43 (control or SD) or ZT6 (control or recovery sleep).

44

45 **Antibodies.** All primary [anti-Arc (Santa Cruz Biotechnology, catalog #: sc-17839), anti-GluA1 (Santa Cruz  
46 Biotechnology, catalog #: sc-55509), anti-GluR1 Ser<sup>831</sup> (Phosphosolutions, catalog #: p1160-831), anti-GluR1  
47 Ser<sup>845</sup> (Phosphosolutions, catalog #: p1160-845), anti-lamin B (Proteintech, catalog #: 12987-1-AP), anti-  
48 beta tubulin (Cell Signaling Technology, catalog #: 2146), anti-histone H3 (Cell Signaling Technology, catalog  
49 #: 4499), and anti-GAPDH (Cell Signaling Technology, catalog #: 5174)] and secondary [anti-mouse IgG–HRP  
50 (Santa Cruz Biotechnology, catalog #: sc-2005), anti-rabbit IgG–HRP (Santa Cruz Biotechnology, catalog #:  
51 sc-2357), and anti-mouse IgG–Alexa 594 (Molecular Probes, catalog #: A-11032)] antibodies were  
52 commercially obtained.

53

54 **SDS–PAGE and Immunoblotting.** Protein samples were separated using appropriate concentrations of  
55 acrylamide SDS–PAGE and transferred onto PVDF membranes. After antibody incubations, target protein  
56 signals were detected using the SuperSignal West Pico Chemiluminescence Substrate (Thermo Scientific) or  
57 the ECL™ Prime Western Blotting Detection System (GE Healthcare). Membranes were used repeatedly  
58 after stripping.

59

60 **Coomassie Staining.** The membrane was briefly washed with a fixing solution (50% methanol and 10%  
61 acetic acid), incubated with a staining solution (fixing solution containing 0.1% Coomassie Brilliant Blue R-  
62 250), and washed with the fixing solution until signals reached the desired staining levels for detection. For

63 immunoblot analysis, three bands were collected: >75 kDa, between 48–75 kDa, and <48 kDa, respectively,  
64 and the densitometry values of each band were combined in individual mice and then averaged. These  
65 values were used for the normalization of immunoblots of synaptoneurosomal samples (3).

66

67 **Synaptoneurosomal Preparation.** As described in SI Ref. 4, mice were deprived of total sleep for 4 h and  
68 synaptoneurosomes from the frontal cortex were prepared. Subsequently, synaptoneurosomes were lysed  
69 in 2.5% SDS, boiled for 10 min, and a 50- $\mu$ g aliquot was used as synaptoneurosomal sample. A total  
70 homogenate that was filtrated through a 100- $\mu$ m membrane was combined with an adequate amount of  
71 10% SDS solution to the final concentration of 1% SDS. Synaptoneurosomal protein was validated by  
72 immunoblot (Fig. S3) using samples of total homogenate, synaptoneurosomal, and supernatant.

73

74 **RNA Extraction, Reverse Transcription PCR, and Quantitative Real-Time PCR (qRT-PCR).** Total RNA was  
75 extracted from the frontal cortex sample and reverse transcribed to cDNA, as described in SI Ref. 4. qRT-  
76 PCR was carried out using the primer pairs listed in SI Appendix, Table S1 under 30 PCR cycles. All reactions  
77 were normalized to *GAPDH*, which was used as an endogenous control, and expressed relatively.

78

79 **Immunofluorescence.** For immunofluorescence, brains were perfused with PBS and 4% paraformaldehyde  
80 in PBS, immersed in 30% sucrose in PBS for 48 h at 4° C, and sectioned into 35- $\mu$ m slices using a microtome.  
81 A free-floating method was used in this experiment. Coronal brain sections were washed with PBS three  
82 times, blocked and permeabilized with 2% blocking solution (Roche) in PBS containing 0.3% Triton X-100  
83 for 1 h at room temperature, and incubated with the primary antibody overnight at 4° C, followed by the  
84 anti-mouse Alexa 568 antibody for 2 h at room temperature. Excess amounts of antibodies were washed  
85 out with PBS after antibody incubation. DAPI was used for the detection of nuclei (ProLong Gold Antifade  
86 Reagent, Invitrogen).

87

88 **Cell Counting.** Cell counts for nuclear Arc-positive cells and subcellular localization were made in the layer  
89 II-IV of the motor cortex area (bregma  $\pm$  100  $\mu$ m) from two to three consecutive sections per mouse. Prior  
90 to cell counting, fluorescence images obtained with an Olympus BX-60 microscope (60x objective) were  
91 adjusted using Adobe Photoshop CS5. The following output/input levels were used: Red, 0-153/36-115;  
92 Blue, 0-140/26-133; Green, entirely off. These threshold values were obtained according to the pixel  
93 intensities for nuclear Arc staining in SD samples. Then, cell counting was done blindly in all four conditions.  
94 Cells were counted (150–200 cells per brain; 10–15 brains in each condition) using images adjusted by  
95 Adobe Photoshop as described above. The number of cells with nuclear Arc and cytoplasmic Arc was  
96 described as the percentage of all Arc-positive cells.

97

98 **Confocal imaging.** Representative images of Arc immunofluorescence were scanned using the Zeiss  
99 confocal microscope LSM 800 with a 63x oil immersion objective. The same scanning parameters were used  
100 for all samples. The images shown in Fig. 4 were chosen from a similar region of the motor cortex. Zen  
101 software from Zeiss was used to convert all confocal images into TIF images (RGB, 300 dpi). The contrast  
102 and brightness were uniformly adjusted using Adobe Photoshop.

103

104 **Nuclear isolation.** Nuclei were isolated from the frontal cortex using a combined version of the methods  
105 described by by Lovtrup-Rein et al. and Tanaka et al. (5, 6). All of the following processes were carried out  
106 at 4° C. The dissected frontal cortex was homogenized with A buffer [50 mM Tris-HCl (pH 7.5), 25 mM KCl,  
107 5 mM MgCl<sub>2</sub>, and 0.32 M sucrose] containing 0.25% Triton X-100, cOmplete™ mini (Roche), and a  
108 phosphatase inhibitor cocktail (Sigma-Aldrich) (sample 1) and centrifuged at 800  $\times$  g for 10 min,

109 subsequently, the supernatant (sample 2) was removed. The pellet was washed twice with the A buffer and  
110 centrifuged at  $800 \times g$  for 10 min. The pellet was resuspended in the A buffer, mixed with five volumes of  
111 sucrose buffer [50 mM Tris-HCl (pH 7.5), 25 mM KCl, 1 mM  $\text{CaCl}_2$ , 2.24 M sucrose, and 0.2% Nonidet-P], and  
112 centrifuged at  $53,500 \times g$  for 2 h. The pellet was used as the nuclear fraction (sample 3). All buffers  
113 mentioned above contained 1 mM PMSF. Fractionation was validated using sample 1–3 for total,  
114 cytoplasmic, and nuclear proteins, respectively, using Coomassie staining and immunoblotting (SI Appendix,  
115 Fig. S6C). For immunoblot analysis, nuclear samples were lysed in a 2D lysis buffer (7), while total  
116 homogenates and cytoplasmic samples were combined in the same volume of the 2D lysis buffer.

117

118 **Statistics.** Data were expressed as the mean and SEM. Immunoblotting and qRT-PCR data were expressed  
119 relative to the means of WT ZT4 control mice. Statistical analysis was performed using GraphPad Prism7.  
120 Once two-way ANOVA detects a significance ( $P < 0.05$ ), Sidak's multiple comparison tests were  
121 subsequently performed. Student's unpaired  $t$ -test was carried out for comparisons between two groups.

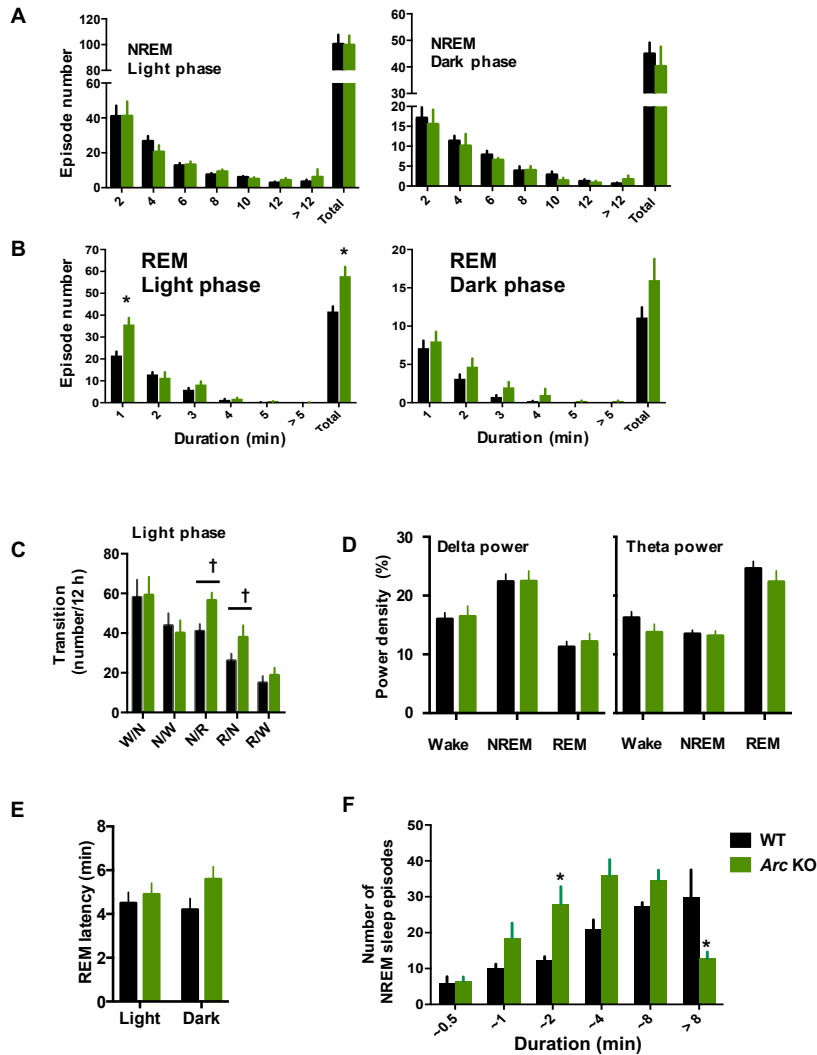

122

123 **Fig. S1. Arc KO mice sleep phenotype and sleep parameters.**

124 Panels A-E indicate baseline conditions, whereas panel F shows recovery condition (ZT4-24). (A, B)  
 125 Distribution of the number of NREM (A) and REM (B) episodes in the light (left) and dark (right) phases. (B)  
 126 Arc KO mice showed increases in short-duration (<1 min) and in the total number of REM episodes in the  
 127 light phase compared to WT mice ( $F(1, 13) = 11.7, P = 0.005$ , two-way ANOVA). (C) Number of transitions  
 128 between wakefulness (W), NREM sleep (N), and REM sleep (R) in the light phase. Arc KO mice showed a  
 129 high frequency of transitions from NREM to REM (N/R) ( $P = 0.003$ ,  $t$ -test) and REM to NREM (R/N) ( $P =$   
 130  $0.001$ ,  $t$ -test) compared to WT mice. (D) Delta and theta power in wakefulness, NREM and REM sleep states.  
 131 No significant differences were observed in delta (left) or theta (right) power across the conditions between  
 132 the genotypes. (E) REM sleep latency was not significantly different between genotypes in the light ( $P =$   
 133  $0.51$ ) and dark ( $P = 0.10$ ) phases. (F) NREM sleep episode consolidation after 4-h SD. Values are expressed  
 134 as means + SEM ( $n = 7$  and  $8$  in each genotype). \*  $P < 0.05$  compared between genotypes by Sidak's multiple-  
 135 comparisons test following two-way ANOVA; †  $P < 0.05$  by unpaired Student's  $t$ -test between genotypes.

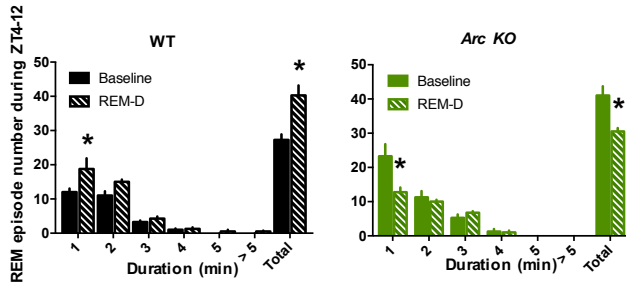

136

137

**Fig. S2. Changes in REM episode duration after a selective 4-h REM deprivation**

138

The distribution of the number of REM episodes was expressed as a 2-h bin during recovery (ZT4–12)

139

following a 4-h selective REM deprivation (REM-D, ZT0–4) in WT (left) and *Arc* KO (right) mice. WT animals

140

showed increases in short REM episode duration and total number of REM episodes ( $F(1, 3) = 37.6$ ,  $P =$

141

$0.009$ , two-way ANOVA), while *Arc* KO mice showed significant decreases in these parameters ( $F(1, 3) =$

142

$17.2$ ,  $P = 0.03$ , two-way ANOVA). \*  $P < 0.05$  compared with time-matched baseline by Sidak's multiple-

143

comparisons test following two-way ANOVA ( $n = 4$  in each genotype).

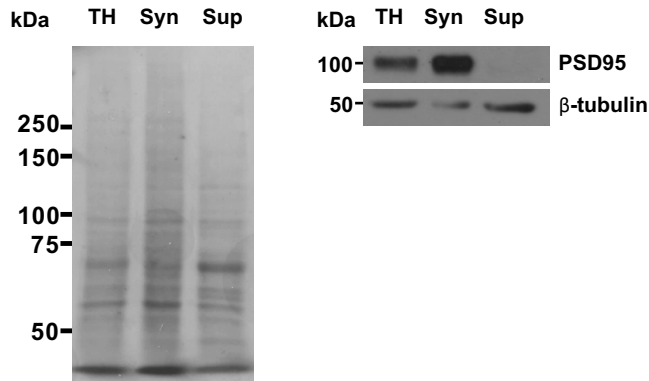

144

145 **Fig. S3. Variation in synaptoneurosomes isolation.**

146 *Left:* Protein samples (10 μg each) were separated by 7.5% SDS-PAGE and transferred onto a PVDF  
 147 membrane. The Coomassie-stained membrane shows a clear difference in the protein pattern among the  
 148 total homogenate (TH), synaptoneurosomes (Syn), and supernatant (Sup). *Right:* In the immunoblot, PSD95  
 149 (*top*) and β-tubulin (*bottom*) were used as synaptic and cytoplasmic markers, respectively. PSD95 was  
 150 enriched and β-tubulin was diminished in Syn.

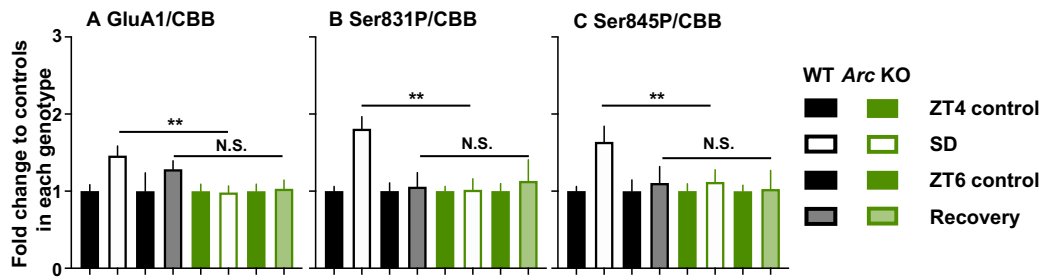

151

152 **Fig. S4. Comparison of changes in SD-induced Synaptoneurosome GluA1 expression between genotypes.**

153 The results of Fig. 2C–E were re-normalized to its respective time-matched control at ZT4 or ZT6 and

154 expressed as fold changes. Following 4-h SD, Arc KO mice showed significantly lower synaptoneurosome

155 GluA1 (A), GluA1 phosphorylation at Ser831 (Ser831P, B), and Ser845 (Ser845P, C) levels than those of WT

156 mice. Following 2-h recovery sleep, no significant differences were observed in GluA1, Ser831P, and

157 Ser845P expression in synaptoneurosome between the genotypes. \*\*  $P < 0.01$ , N.S., not significant by

158 Sidak's multiple-comparison test following two-way ANOVA between genotypes ( $n = 8-14$  in each

159 genotype).



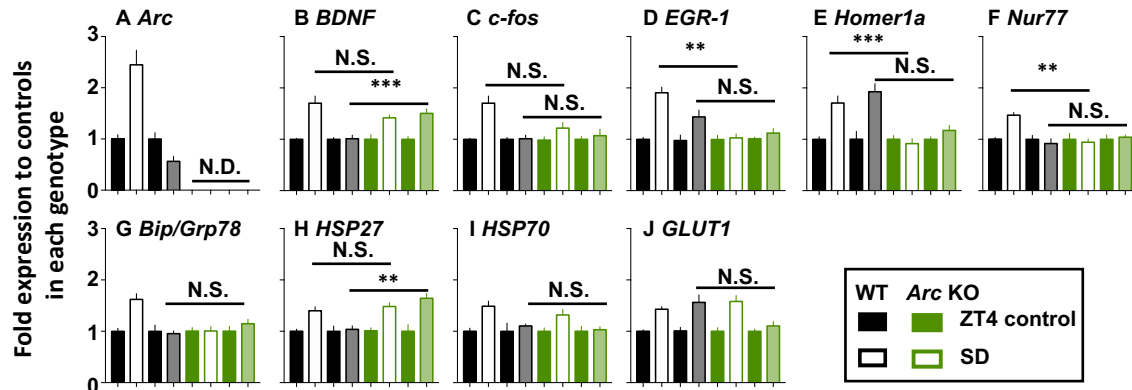

160

161

162

**Fig. S5. Comparison of changes in seep-related gene expression in response to SD and recovery sleep between genotypes.**

163

164

165

166

167

168

169

170

171

To compare SD-induced gene expression between the genotypes, the expression of the sleep-related genes shown in Fig. 3 was re-normalized to its time-matched control at ZT4 or ZT6, and expressed as fold change. After 4-h SD, Arc KO mice showed an attenuation of SD-induced *EGR-1* (D), *Homer1a* (E), *Nur77* (F), and *Bip/Grp78* (G) mRNA levels compared with WT mice. Following 2-h recovery sleep, Arc KO mice maintained higher levels of *BDNF* and *HSP27* mRNAs (B, I) compared to WT mice, suggesting that Arc KO mice lacked the ability to revert the levels of those genes to control compared to WT mice. No significant differences were observed in the other genes at ZT6 (A, C–G, I, J). These results were approximately consistent with the result from Figure 3. \*\*  $P < 0.01$ , \*\*\*  $P < 0.0001$ , N.S., not significant by Sidak's multiple-comparison test following two-way ANOVA; N.D., not detected ( $n = 6-14$ ).

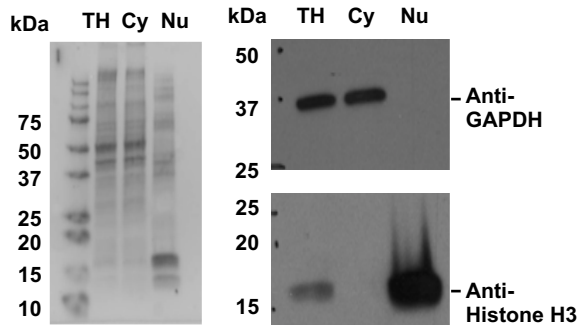

172

173

**Fig. S6. Subcellular fractionations of nuclear and cytoplasm were verified by immune blot.**

174

Variation in nuclear fraction isolation. *Left*: Protein samples (10  $\mu$ g each) were separated by 12% SDS-PAGE

175

and transferred onto a PVDF membrane. The Coomassie-stained membrane showed a clear difference in

176

the protein pattern between the nuclear fraction (Nu) and total homogenate (TH) and/or cytoplasmic

177

fraction (Cy). *Right*: In the immunoblot, GAPDH (*right top*) and histone H3 (*right bottom*) were used as

178

cytoplasmic and nuclear protein markers, respectively. The nuclear protein was enriched in Nu, which

179

showed hardly detectable GAPDH (*right top*) and robust histone H3 (*right bottom*) signals relative to the TH

180

and Cy samples.

181 **Table S1.** Sequences of primer pairs for real-time quantitative PCR (qRT-PCR)

| Gene             | Forward/Reverse | Sequence                     | Accession no.  |
|------------------|-----------------|------------------------------|----------------|
| <i>Arc</i>       | Forward         | Mm01204954_g1 (Taqman probe) | NM_018790.3    |
|                  | Reverse         |                              |                |
| <i>BDNF</i>      | Forward         | CCATAAAGGACGCGGACTTGTACA     | NM_007540.4    |
|                  | Reverse         | AGACATGTTTGCGGCATCCAG        |                |
| <i>Bip/GRP78</i> | Forward         | GCTTCGTGTCTCCTCCTGAC         | NM_022310.3    |
|                  | Reverse         | GGAATAGGTGGTCCCAAGT          |                |
| <i>c-fos</i>     | Forward         | CTGTCAACACACAGGACTTTT        | NM_010234.2    |
|                  | Reverse         | AGGAGATAGCTGCTCTACTTTG       |                |
| <i>EGR-1</i>     | Forward         | GCCGAGCGAACAACCCTA           | NM_007913      |
|                  | Reverse         | TTCAGAGCGATGTCAGAAA          |                |
| <i>GAPDH</i>     | Forward         | GTGGCAAAGTGGAGATTGTTGCC      | NM_008084.3    |
|                  | Reverse         | GATGATGACCCGTTTGCTCC         |                |
| <i>GluA1</i>     | Forward         | Mm00433753_m1 (Taqman probe) | NM_001113325.2 |
|                  | Reverse         |                              |                |
| <i>GLUT1</i>     | Forward         | CCTATGGCCAAGGACACACT         | NM_011400.3    |
|                  | Reverse         | CTGGTGTGAGCAAGGAAAG          |                |
| <i>HSP27</i>     | Forward         | GACAGCTCAGCAGCGGGGTCTC       | NM_011982.2    |
|                  | Reverse         | TAAGTGTGCCCTCAGGGGATAGGG     |                |
| <i>HSP70</i>     | Forward         | CCAAGGTGCAGGTGAACTACA        | NM_031165.4    |
|                  | Reverse         | TCAGCACCATGGACGAGATCT        |                |
| <i>Homer1a</i>   | Forward         | ATGAACTCCATATTTATCCACCTTACTT | NM_013560.2    |
|                  | Reverse         | GCATTGCCATTTCCACATAGG        |                |
| <i>Nur77</i>     | Forward         | TGATGTTCCCGCCTTTGC           | NM_010444.1    |
|                  | Reverse         | GAGCCCGTGTGATCAGTG           |                |

*Arc*, activity-regulated cytoskeletal-associated protein; *BDNF*, brain-derived neurotrophic factor; *Bip/GRP78*, binding immunoglobulin protein/glucose-regulated protein 78; *EGR-1*, early growth response protein 1; *GAPDH*, glyceraldehyde 3-phosphate dehydrogenase; *GluA1*,  $\alpha$ -amino-3-hydroxy-5-methyl-4-isoxazolepropionic acid (AMPA) receptor, glutamate A1; *Glut1*, glucose transporter 1; *HSP27*, heat shock protein 27; *HSP70*, heat shock protein 70

183 **SI References**

- 184 1. Wang KH, et al. (2006) In vivo two-photon imaging reveals a role of arc in enhancing orientation  
185 specificity in visual cortex. *Cell* 126(2):389–402.
- 186 2. Bjorness TE, Kelly CL, Gao T, Poffenberger V, Greene RW (2009) Control and Function of the  
187 Homeostatic Sleep Response by Adenosine A1 Receptors. *J Neurosci* 29(5):1267–1276.
- 188 3. Bermejo MK, Milenkovic M, Salahpour A, Ramsey AJ (2014) Preparation of Synaptic Plasma  
189 Membrane and Postsynaptic Density Proteins Using a Discontinuous Sucrose Gradient. *J Vis Exp*  
190 (91):1–8.
- 191 4. Vyazovskiy V V., Cirelli C, Pfister-Genskow M, Faraguna U, Tononi G (2008) Molecular and  
192 electrophysiological evidence for net synaptic potentiation in wake and depression in sleep.  
193 *Nat Neurosci* 11(2):200–208.
- 194 5. Lovtrup-Rein H, McEwen BS (1966) Isolation and fractionation of rat brain nuclei. *J Cell Biol*  
195 30(2):405–415.
- 196 6. Tanaka T, Kishi K, Igawa M, Takase S, Goda T (1998) Dietary carbohydrates enhance  
197 lactase/phlorizin hydrolase gene expression at a transcription level in rat jejunum. *Biochem J*  
198 331(1):225–230.
- 199 7. Suzuki A, Sinton CM, Greene RW, Yanagisawa M (2013) Behavioral and biochemical dissociation  
200 of arousal and homeostatic sleep need influenced by prior wakeful experience in mice. *Proc*  
201 *Natl Acad Sci* 110(25):10288–10293.
